# Supplementary material for: Sense of body ownership and body agency in schizophrenia
Source: PubMed Central journal article supplement (PMC9653492; doi:10.1038/s41598-022-23988-y), 2022-11-12
Supplement: 41598_2022_23988_MOESM1_ESM.pdf [file 41598_2022_23988_MOESM1_ESM.pdf]

## **Sense of body ownership and body agency in schizophrenia.**

Ileana Rossetti, Martina Repossi, Vincenzo Florio, Benedetta Demartini,  
Andreas Conca, Orsola Gambini, Angelo Maravita

[Supplementary information](#)

## S1 Specification of the statistical models and analyses

We analysed questionnaire data with LMM (lme {nlme}) in order to accommodate the repeated-measures experimental design. The analysis has been carried out employing procedures illustrated in West et al. (2007).

We started building a model including the fixed effects of all the covariates (and interactions) we wished to consider (*Mode of Movement*, *Delay* and *Group*) using Restricted Maximum Likelihood (REML) estimation of parameters. A second model also included by-subject random intercept. We compared these two models to confirm the need for the random predictor. Because a larger variability of data was apparent in patients' group according to summary statistics and boxplot in all questionnaire components, we explored whether to retain heterogeneous residual variance structures. In a third model we allowed residual variance parameters to differ between levels of the categorical variable *Group* and checked model fitting improvement. We next refitted the preferred model using Maximum Likelihood (ML) estimation of parameters and passed it to an automated reduction procedure based on the AIC-based selection of fixed-effect parameters (stepAIC {MASS}). We kept model resulting from this procedure as our final model. The REML-based final model was lastly used to test fixed effects (F-test, marginal SS) and to carry out diagnostics of residuals and random effects ({HLMdiag}).

Shown below boxplots and descriptive statistics of each embodiment component scores, the summary statistics of the final models, the output of the F-tests and model diagnostics. In the final model table, the upper part lists the fixed-effect parameter estimates, their standard error (SE), confidence interval and corresponding t-tests. The lower subsection shows random-effect statistics describing the random-intercept variance ( $\sigma^2$ ), the variation between individual intercepts and average intercept ( $\tau_{00\text{ID}}$ ) and the intraclass correlation (ICC).

## S1.1 SoO

### Descriptive statistics

|    | Group | Mode    | Delay | N  | MEAN  | SD   | 95%CI |
|----|-------|---------|-------|----|-------|------|-------|
| 1  | CTR   | Active  | 120   | 32 | 1.52  | 1.33 | ±0.48 |
| 2  | CTR   | Active  | 220   | 32 | 0.53  | 1.11 | ±0.4  |
| 3  | CTR   | Active  | 320   | 32 | 0.05  | 1.09 | ±0.39 |
| 4  | CTR   | Active  | 420   | 32 | -0.21 | 0.90 | ±0.32 |
| 5  | CTR   | Passive | 120   | 32 | 0.50  | 1.00 | ±0.36 |
| 6  | CTR   | Passive | 220   | 32 | -0.03 | 1.07 | ±0.39 |
| 7  | CTR   | Passive | 320   | 32 | -0.45 | 0.95 | ±0.34 |
| 8  | CTR   | Passive | 420   | 32 | -0.55 | 1.02 | ±0.37 |
| 9  | SCZ   | Active  | 120   | 29 | 0.55  | 1.34 | ±0.51 |
| 10 | SCZ   | Active  | 220   | 29 | 0.61  | 1.73 | ±0.66 |
| 11 | SCZ   | Active  | 320   | 29 | 0.33  | 1.30 | ±0.49 |
| 12 | SCZ   | Active  | 420   | 29 | 0.47  | 1.28 | ±0.49 |
| 13 | SCZ   | Passive | 120   | 29 | -0.37 | 1.68 | ±0.64 |
| 14 | SCZ   | Passive | 220   | 29 | 0.07  | 1.18 | ±0.45 |
| 15 | SCZ   | Passive | 320   | 29 | -0.08 | 1.20 | ±0.46 |
| 16 | SCZ   | Passive | 420   | 29 | -0.22 | 1.17 | ±0.45 |

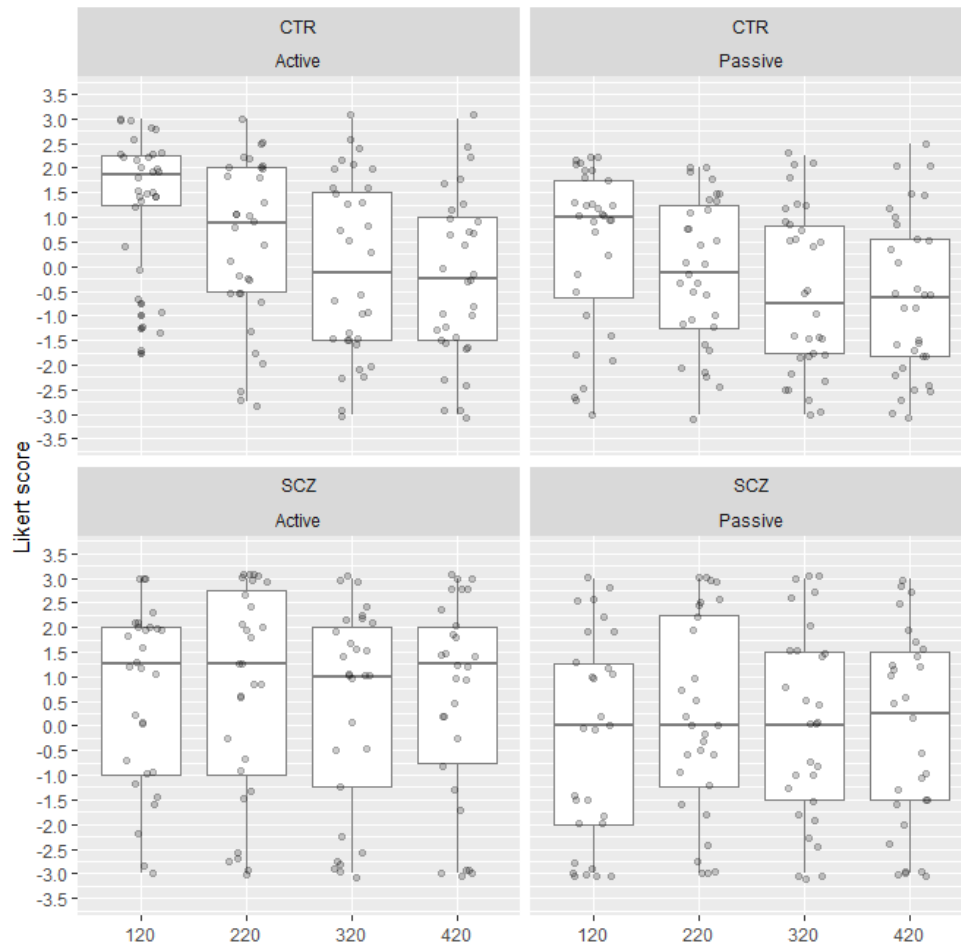

### Final model

The final mixed model for SoO scores has fixed effects associated with *Mode of Movement*, *Delay*, *Group* and the *Delay*×*Group* interaction, a random intercept for each subject and separate residual variance parameters for the two groups of participants.

| Ownership                 |           | Score |               |         |        |        |  |
|---------------------------|-----------|-------|---------------|---------|--------|--------|--|
| Predictors                | Estimates | SE    | 95%CI         | t value | p      | df     |  |
| (Intercept)               | 1.24      | 0.28  | 0.70 – 1.79   | 4.47    | <0.001 | 420.00 |  |
| Mode [Passive]            | -0.62     | 0.11  | -0.83 – -0.41 | -5.77   | <0.001 | 420.00 |  |
| Delay [220]               | -0.76     | 0.19  | -1.13 – -0.39 | -4.04   | <0.001 | 420.00 |  |
| Delay [320]               | -1.21     | 0.19  | -1.59 – -0.84 | -6.44   | <0.001 | 420.00 |  |
| Delay [420]               | -1.39     | 0.19  | -1.76 – -1.02 | -7.38   | <0.001 | 59.00  |  |
| Group [SCZ]               | -0.76     | 0.41  | -1.58 – 0.07  | -1.84   | 0.071  | 420.00 |  |
| Delay [220] * Group [SCZ] | 1.01      | 0.32  | 0.39 – 1.63   | 3.20    | 0.001  | 420.00 |  |
| Delay [320] * Group [SCZ] | 1.25      | 0.32  | 0.63 – 1.87   | 3.95    | <0.001 | 420.00 |  |
| Delay [420] * Group [SCZ] | 1.42      | 0.32  | 0.80 – 2.04   | 4.49    | <0.001 | 420.00 |  |
| <b>Random Effects</b>     |           |       |               |         |        |        |  |
| $\sigma^2$                | 1.14      |       |               |         |        |        |  |
| $\tau_{00 \text{ ID}}$    | 1.82      |       |               |         |        |        |  |
| ICC                       | 0.61      |       |               |         |        |        |  |
| $N_{\text{ID}}$           | 61        |       |               |         |        |        |  |
| Observations              | 488       |       |               |         |        |        |  |
| AIC                       | 1737.948  |       |               |         |        |        |  |
| log-Likelihood            | -856.974  |       |               |         |        |        |  |

### Model diagnostics

Normality of random effects. Shapiro-Wilk test of normality ( $W = 0.97109$ ,  $p\text{-value} = 0.1577$ ).

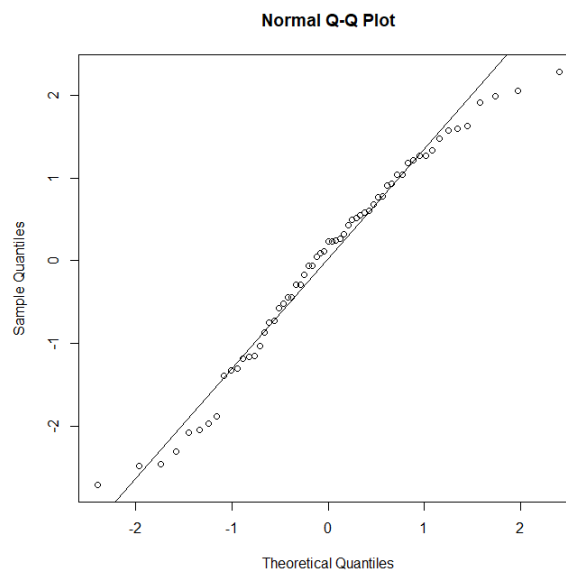

Normality of conditional raw residuals (pooled by Group). Shapiro-Wilk test of normality (Controls:  $W = 0.99533$ ,  $p\text{-value} = 0.6332$ ; Patients:  $W = 0.98903$ ,  $p\text{-value} = 0.07447$ ).

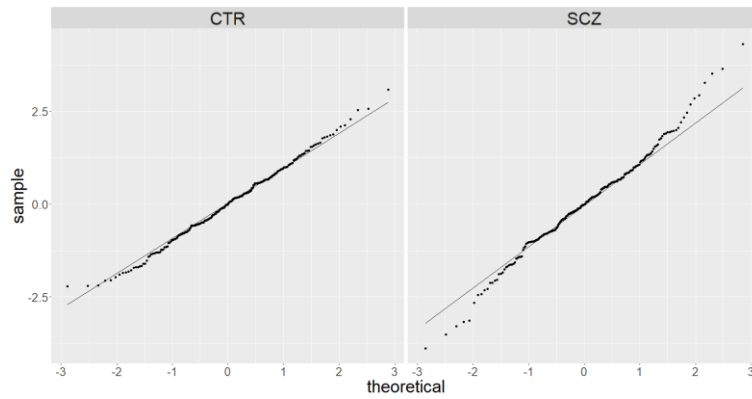

Homogeneity of variance of conditional raw residuals (pooled by Group). Levene's test (Controls:  $F_{7,248} = 0.473$ ,  $p = .854$ ; Patients:  $F_{7,224} = 0.794$ ,  $p = .594$ ).

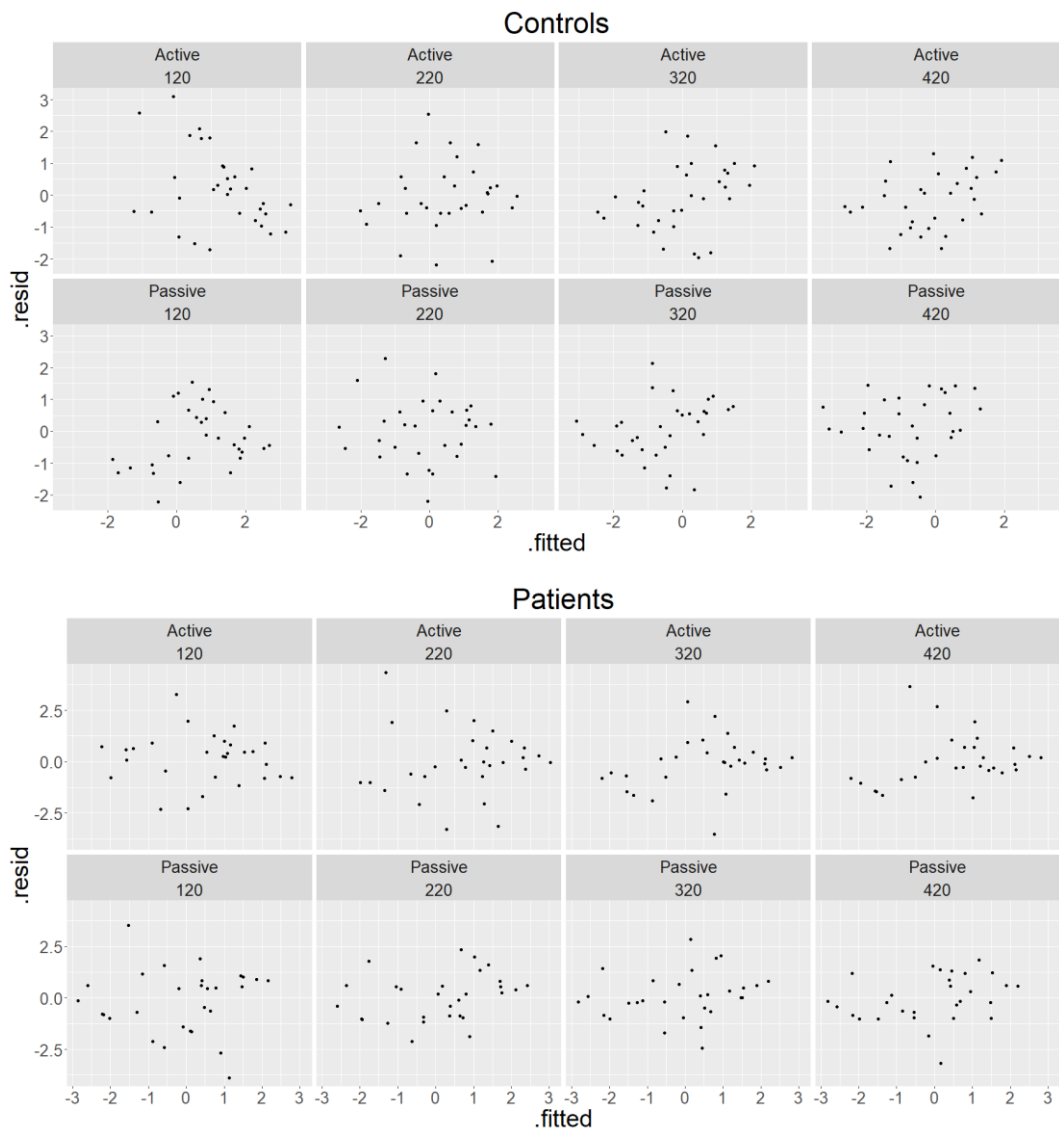

## S1.2 SoA

### Descriptive statistics

|    | Group | Mode    | Delay | N  | MEAN  | SD   | 95%CI |
|----|-------|---------|-------|----|-------|------|-------|
| 1  | CTR   | Active  | 120   | 32 | 2.42  | 1.02 | ±0.37 |
| 2  | CTR   | Active  | 220   | 32 | 1.49  | 1.01 | ±0.36 |
| 3  | CTR   | Active  | 320   | 32 | 0.87  | 1.12 | ±0.4  |
| 4  | CTR   | Active  | 420   | 32 | 0.40  | 1.03 | ±0.37 |
| 5  | CTR   | Passive | 120   | 32 | -0.83 | 1.05 | ±0.38 |
| 6  | CTR   | Passive | 220   | 32 | -1.57 | 0.75 | ±0.27 |
| 7  | CTR   | Passive | 320   | 32 | -1.73 | 0.84 | ±0.3  |
| 8  | CTR   | Passive | 420   | 32 | -1.76 | 0.77 | ±0.28 |
| 9  | SCZ   | Active  | 120   | 29 | 1.54  | 1.55 | ±0.59 |
| 10 | SCZ   | Active  | 220   | 29 | 0.90  | 1.27 | ±0.48 |
| 11 | SCZ   | Active  | 320   | 29 | 0.59  | 1.04 | ±0.39 |
| 12 | SCZ   | Active  | 420   | 29 | 0.62  | 0.95 | ±0.36 |
| 13 | SCZ   | Passive | 120   | 29 | -0.74 | 1.17 | ±0.45 |
| 14 | SCZ   | Passive | 220   | 29 | -1.17 | 0.97 | ±0.37 |
| 15 | SCZ   | Passive | 320   | 29 | -1.20 | 1.22 | ±0.46 |
| 16 | SCZ   | Passive | 420   | 29 | -1.27 | 1.26 | ±0.48 |

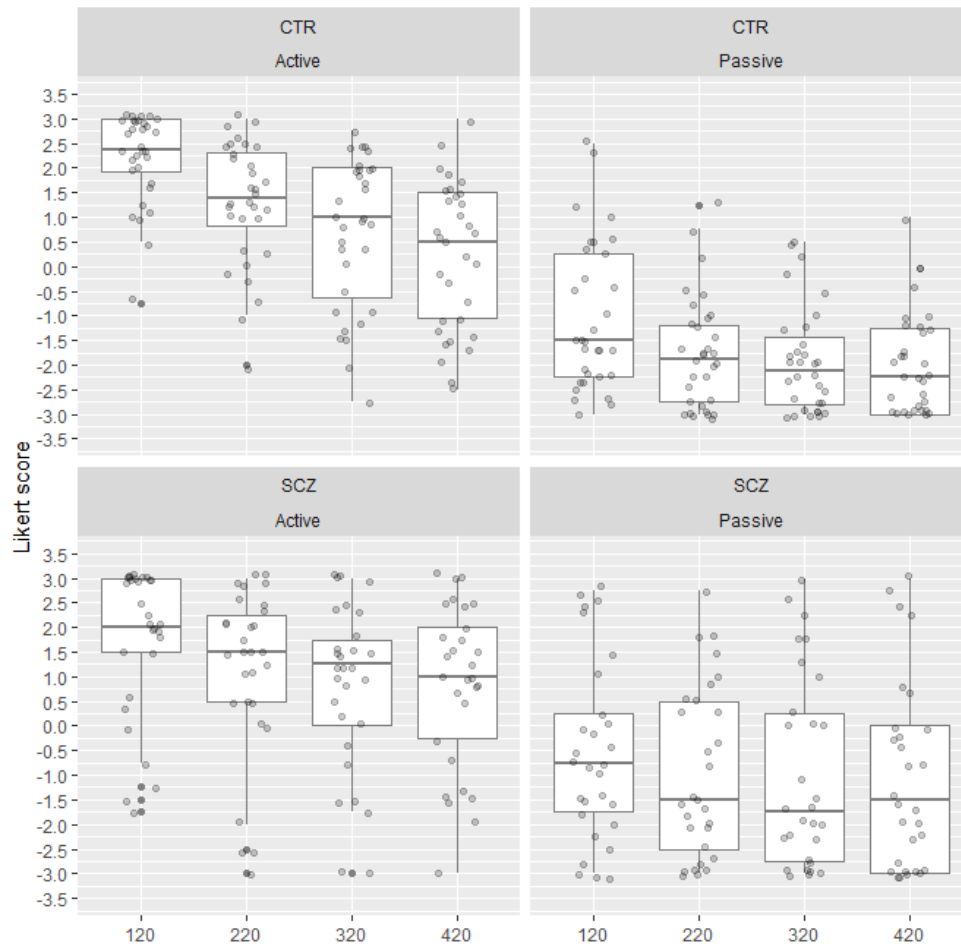

### Final model

The final mixed model for SoA scores has fixed effects associated with *Mode of Movement*, *Delay*, *Group* and the interactions *ModexDelay*, *ModexGroup*, *DelayxGroup*, a random intercept for each subject and different residual variance parameters for the two groups.

| Agency                       |           | Score |               |         |        |        |
|------------------------------|-----------|-------|---------------|---------|--------|--------|
| Predictors                   | Estimates | SE    | 95%CI         | t value | p      | df     |
| (Intercept)                  | 2.18      | 0.24  | 1.70 – 2.66   | 8.92    | <0.001 | 416.00 |
| Mode [Passive]               | -3.17     | 0.20  | -3.57 – -2.77 | -15.61  | <0.001 | 416.00 |
| Delay [220]                  | -0.93     | 0.22  | -1.35 – -0.50 | -4.30   | <0.001 | 416.00 |
| Delay [320]                  | -1.52     | 0.22  | -1.94 – -1.09 | -7.03   | <0.001 | 416.00 |
| Delay [420]                  | -1.89     | 0.22  | -2.31 – -1.46 | -8.75   | <0.001 | 59.00  |
| Group [SCZ]                  | -0.36     | 0.35  | -1.06 – 0.34  | -1.02   | 0.312  | 416.00 |
| Mode [Passive] * Delay [220] | 0.20      | 0.27  | -0.33 – 0.73  | 0.74    | 0.462  | 416.00 |
| Mode [Passive] * Delay [320] | 0.59      | 0.27  | 0.06 – 1.12   | 2.20    | 0.028  | 416.00 |
| Mode [Passive] * Delay [420] | 0.84      | 0.27  | 0.31 – 1.37   | 3.12    | 0.002  | 416.00 |
| Mode [Passive] * Group [SCZ] | 0.76      | 0.20  | 0.37 – 1.15   | 3.85    | <0.001 | 416.00 |
| Delay [220] * Group [SCZ]    | 0.30      | 0.28  | -0.25 – 0.85  | 1.07    | 0.286  | 416.00 |
| Delay [320] * Group [SCZ]    | 0.52      | 0.28  | -0.03 – 1.07  | 1.86    | 0.063  | 416.00 |
| Delay [420] * Group [SCZ]    | 0.74      | 0.28  | 0.20 – 1.29   | 2.67    | 0.008  | 416.00 |
| <b>Random Effects</b>        |           |       |               |         |        |        |
| $\sigma^2$                   | 0.91      |       |               |         |        |        |
| $\tau_{00}$ ID               | 1.13      |       |               |         |        |        |
| ICC                          | 0.55      |       |               |         |        |        |
| N ID                         | 61        |       |               |         |        |        |
| Observations                 | 488       |       |               |         |        |        |
| AIC                          | 1617.378  |       |               |         |        |        |
| log-Likelihood               | -792.689  |       |               |         |        |        |

### Model diagnostics

Normality of random effects. Shapiro-Wilk test of normality ( $W = 0.98966$ ,  $p\text{-value} = 0.8877$ ).

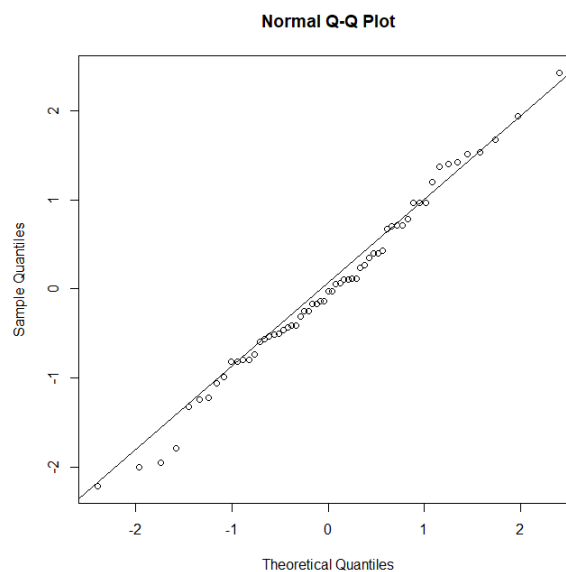

Normality of conditional raw residuals (pooled by Group). Shapiro-Wilk test of normality (Controls:  $W = 0.99259$ ,  $p\text{-value} = 0.2304$ ; Patients:  $W = 0.99352$ ,  $p\text{-value} = 0.4126$ ).

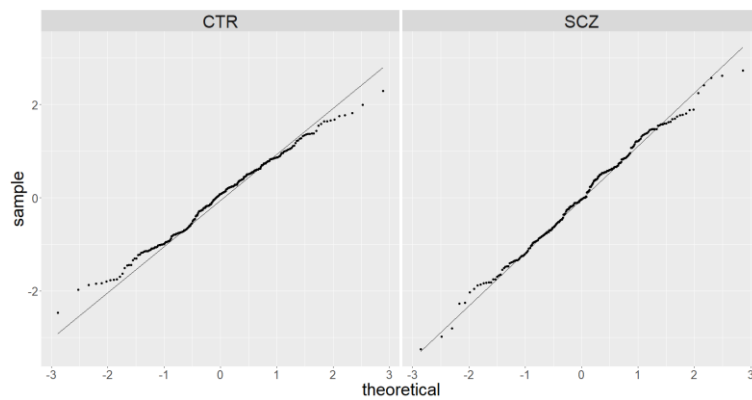

Homogeneity of variance of conditional raw residuals (pooled by Group). Levene's test (Controls:  $F_{7,248} = 1.388$ ,  $p = .211$ ; Patients:  $F_{7,224} = 1.181$ ,  $p = .315$ ).

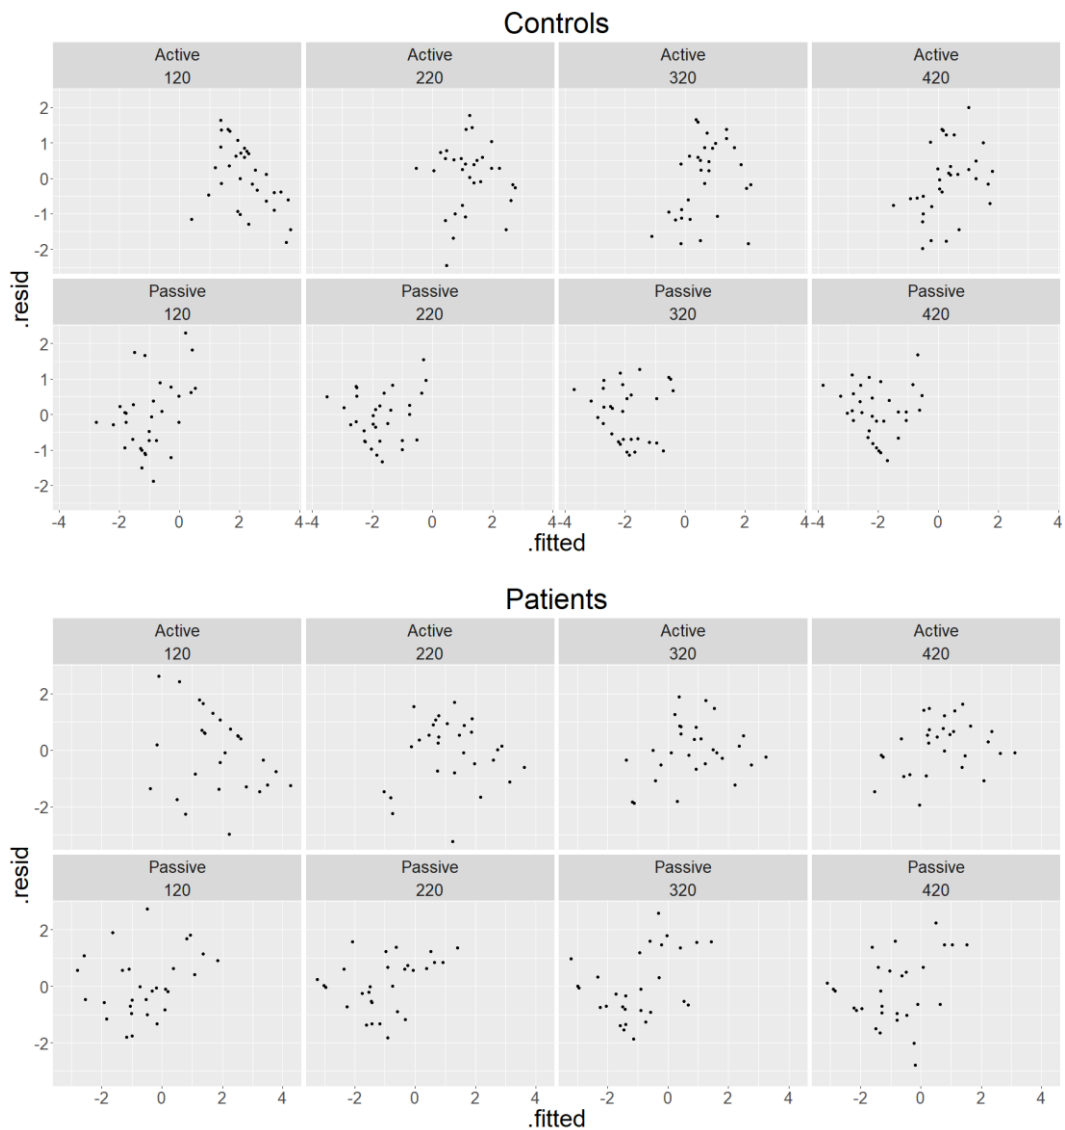



### S1.3 SoO-control

#### Descriptive statistics

|    | Group | Mode    | Delay | N  | MEAN  | SD   | 95%CI |
|----|-------|---------|-------|----|-------|------|-------|
| 1  | CTR   | Active  | 120   | 32 | -1.43 | 0.76 | ±0.27 |
| 2  | CTR   | Active  | 220   | 32 | -1.28 | 0.56 | ±0.2  |
| 3  | CTR   | Active  | 320   | 32 | -1.36 | 0.62 | ±0.22 |
| 4  | CTR   | Active  | 420   | 32 | -1.37 | 0.61 | ±0.22 |
| 5  | CTR   | Passive | 120   | 32 | -1.18 | 0.71 | ±0.25 |
| 6  | CTR   | Passive | 220   | 32 | -1.33 | 0.66 | ±0.24 |
| 7  | CTR   | Passive | 320   | 32 | -1.13 | 0.85 | ±0.31 |
| 8  | CTR   | Passive | 420   | 32 | -1.14 | 0.56 | ±0.2  |
| 9  | SCZ   | Active  | 120   | 29 | -1.33 | 0.80 | ±0.31 |
| 10 | SCZ   | Active  | 220   | 29 | -1.15 | 0.95 | ±0.36 |
| 11 | SCZ   | Active  | 320   | 29 | -1.41 | 0.80 | ±0.3  |
| 12 | SCZ   | Active  | 420   | 29 | -1.26 | 0.85 | ±0.32 |
| 13 | SCZ   | Passive | 120   | 29 | -1.60 | 0.87 | ±0.33 |
| 14 | SCZ   | Passive | 220   | 29 | -1.08 | 0.82 | ±0.31 |
| 15 | SCZ   | Passive | 320   | 29 | -0.94 | 0.92 | ±0.35 |
| 16 | SCZ   | Passive | 420   | 29 | -1.44 | 1.21 | ±0.46 |

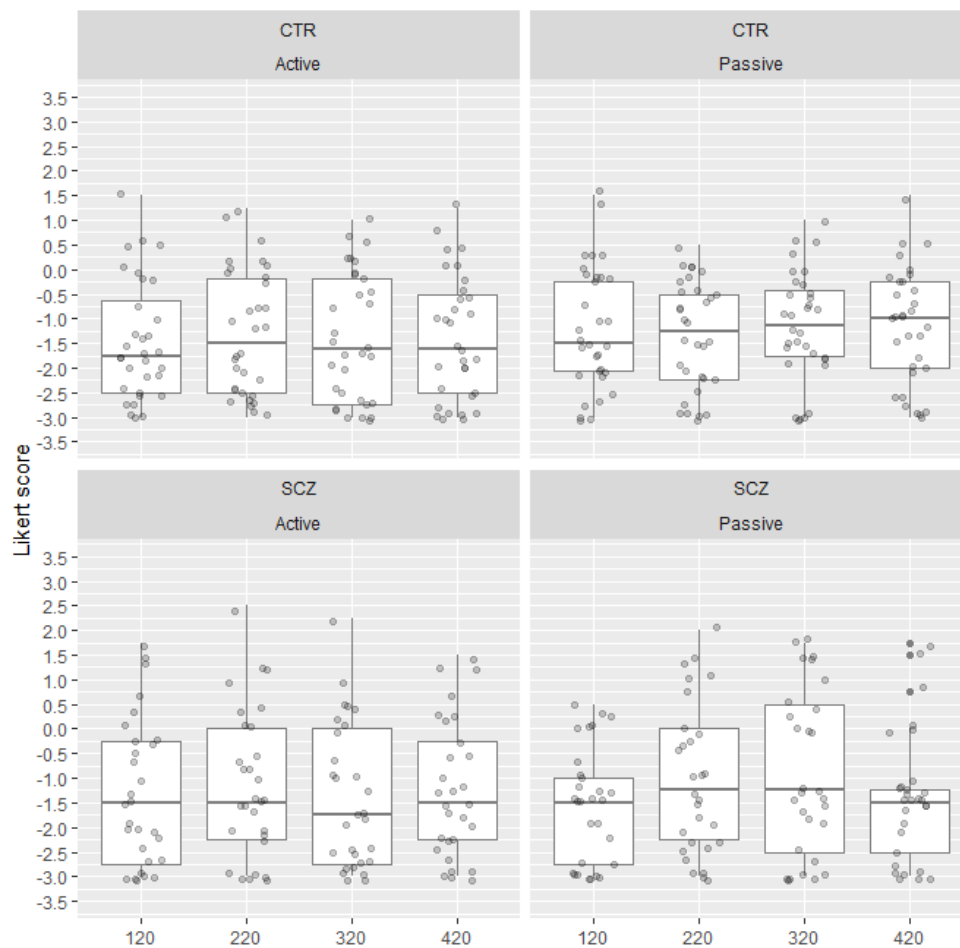

### *Final model*

Model for SoO-control data includes a random intercept for each subject and separate residual variance parameters for the two groups of participants. The stepwise model selection has removed all fixed-effect parameters but the last effect *Mode of Movement*.

### S1.3 SoA-control

#### Descriptive statistics

|    | Group | Mode    | Delay | N  | MEAN  | SD   | 95%CI |
|----|-------|---------|-------|----|-------|------|-------|
| 1  | CTR   | Active  | 120   | 32 | -1.67 | 0.92 | ±0.33 |
| 2  | CTR   | Active  | 220   | 32 | -1.01 | 0.97 | ±0.35 |
| 3  | CTR   | Active  | 320   | 32 | -0.88 | 0.93 | ±0.33 |
| 4  | CTR   | Active  | 420   | 32 | -0.73 | 0.97 | ±0.35 |
| 5  | CTR   | Passive | 120   | 32 | 0.81  | 1.00 | ±0.36 |
| 6  | CTR   | Passive | 220   | 32 | 1.02  | 0.78 | ±0.28 |
| 7  | CTR   | Passive | 320   | 32 | 1.17  | 0.80 | ±0.29 |
| 8  | CTR   | Passive | 420   | 32 | 1.14  | 0.80 | ±0.29 |
| 9  | SCZ   | Active  | 120   | 29 | -0.61 | 0.96 | ±0.37 |
| 10 | SCZ   | Active  | 220   | 29 | -0.38 | 1.08 | ±0.41 |
| 11 | SCZ   | Active  | 320   | 29 | -0.25 | 1.08 | ±0.41 |
| 12 | SCZ   | Active  | 420   | 29 | -0.36 | 1.00 | ±0.38 |
| 13 | SCZ   | Passive | 120   | 29 | 0.50  | 0.94 | ±0.36 |
| 14 | SCZ   | Passive | 220   | 29 | 0.44  | 1.04 | ±0.39 |
| 15 | SCZ   | Passive | 320   | 29 | 0.31  | 1.05 | ±0.4  |
| 16 | SCZ   | Passive | 420   | 29 | 0.19  | 0.98 | ±0.37 |

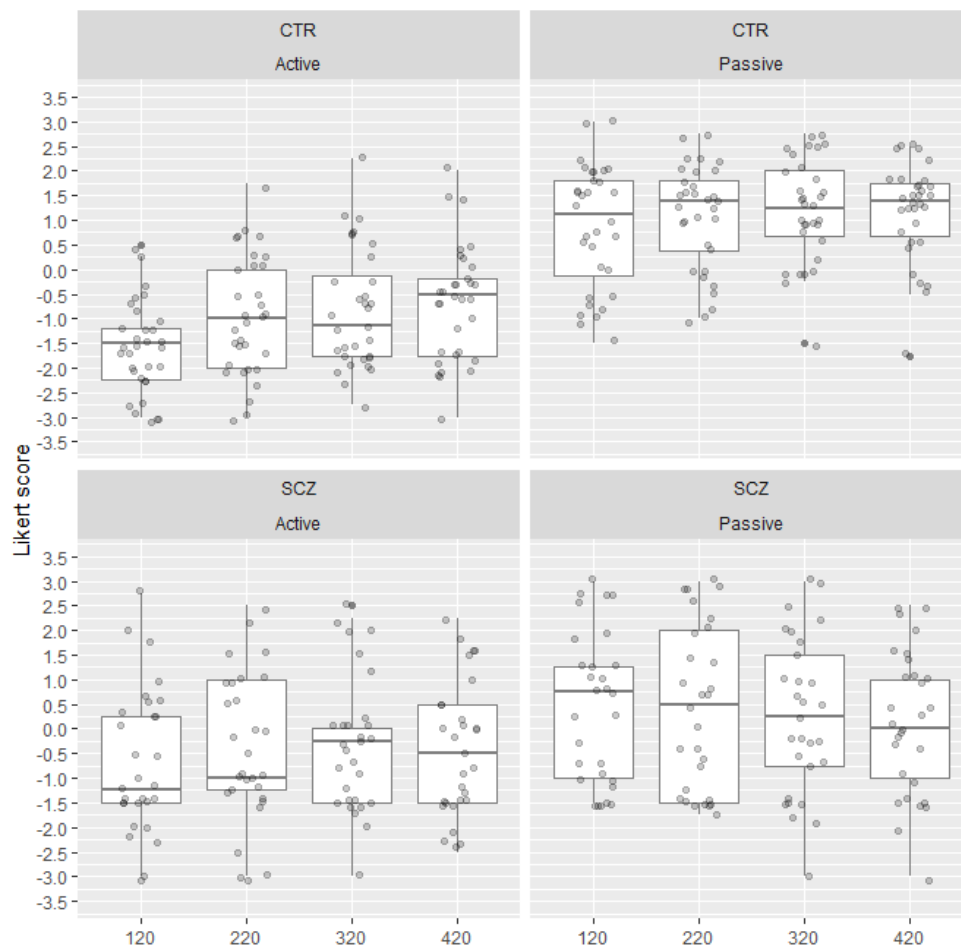

### Final model

The final mixed model for SoA-control scores has fixed effects associated with *Mode of Movement*, *Delay*, *Group* and the interactions *ModexDelay*, *ModexGroup*, *DelayxGroup*, a random intercept for each subject and separate residual variance parameters for the two groups of participants.

| Agency - Control items       |           | Score |               |         |        |        |
|------------------------------|-----------|-------|---------------|---------|--------|--------|
| Predictors                   | Estimates | SE    | 95%CI         | t value | p      | df     |
| (Intercept)                  | -1.60     | 0.21  | -2.02 – -1.19 | -7.53   | <0.001 | 416.00 |
| Mode [Passive]               | 2.47      | 0.19  | 2.10 – 2.83   | 13.27   | <0.001 | 416.00 |
| Delay [220]                  | 0.62      | 0.20  | 0.23 – 1.01   | 3.13    | 0.002  | 416.00 |
| Delay [320]                  | 0.81      | 0.20  | 0.42 – 1.20   | 4.07    | <0.001 | 416.00 |
| Delay [420]                  | 0.93      | 0.20  | 0.54 – 1.32   | 4.66    | <0.001 | 59.00  |
| Group [SCZ]                  | 0.92      | 0.30  | 0.33 – 1.52   | 3.09    | 0.003  | 416.00 |
| Mode [Passive] * Delay [220] | -0.38     | 0.24  | -0.86 – 0.10  | -1.56   | 0.118  | 416.00 |
| Mode [Passive] * Delay [320] | -0.47     | 0.24  | -0.95 – 0.00  | -1.95   | 0.052  | 416.00 |
| Mode [Passive] * Delay [420] | -0.59     | 0.24  | -1.07 – -0.11 | -2.43   | 0.016  | 416.00 |
| Mode [Passive] * Group [SCZ] | -1.35     | 0.17  | -1.69 – -1.00 | -7.73   | <0.001 | 416.00 |
| Delay [220] * Group [SCZ]    | -0.34     | 0.25  | -0.83 – 0.14  | -1.39   | 0.165  | 416.00 |
| Delay [320] * Group [SCZ]    | -0.49     | 0.25  | -0.97 – -0.00 | -1.98   | 0.048  | 416.00 |
| Delay [420] * Group [SCZ]    | -0.66     | 0.25  | -1.15 – -0.18 | -2.69   | 0.007  | 416.00 |
| <b>Random Effects</b>        |           |       |               |         |        |        |
| $\sigma^2$                   | 0.80      |       |               |         |        |        |
| $\tau_{00}$ ID               | 0.78      |       |               |         |        |        |
| ICC                          | 0.49      |       |               |         |        |        |
| N ID                         | 61        |       |               |         |        |        |
| Observations                 | 488       |       |               |         |        |        |
| AIC                          | 1504.136  |       |               |         |        |        |
| log-Likelihood               | -736.068  |       |               |         |        |        |

### Model diagnostics

Normality of random effects. Shapiro-Wilk test of normality ( $W = 0.98671$ ,  $p$ -value = 0.7494).

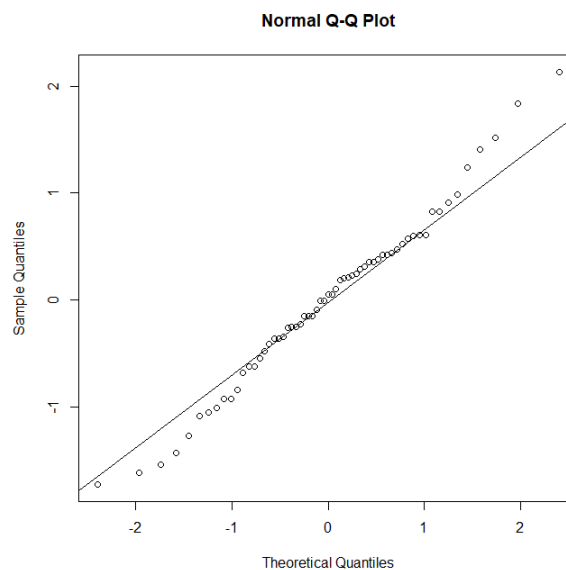

Normality of conditional raw residuals (pooled by Group). Shapiro-Wilk test of normality (Controls:  $W = 0.9947$ ,  $p\text{-value} = 0.517$ ; Patients:  $W = 0.9898$ ,  $p\text{-value} = 0.1013$ )

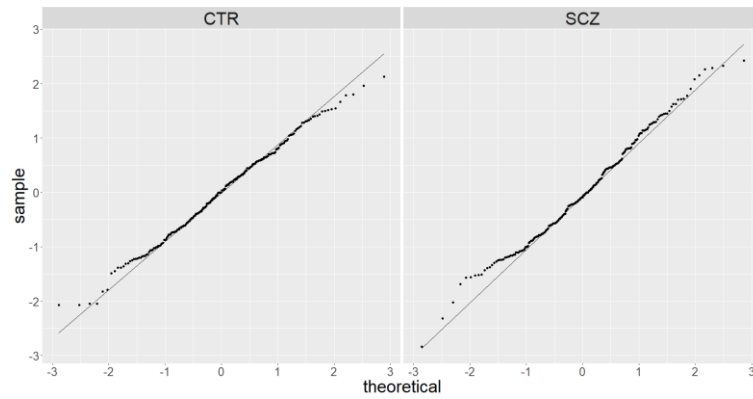

Homogeneity of variance of conditional raw residuals (pooled by Group). Levene's test (Controls:  $F_{7,248} = 0.53$ ,  $p = .812$ ; Patients:  $F_{7,224} = .169$ ,  $p = .991$ ).

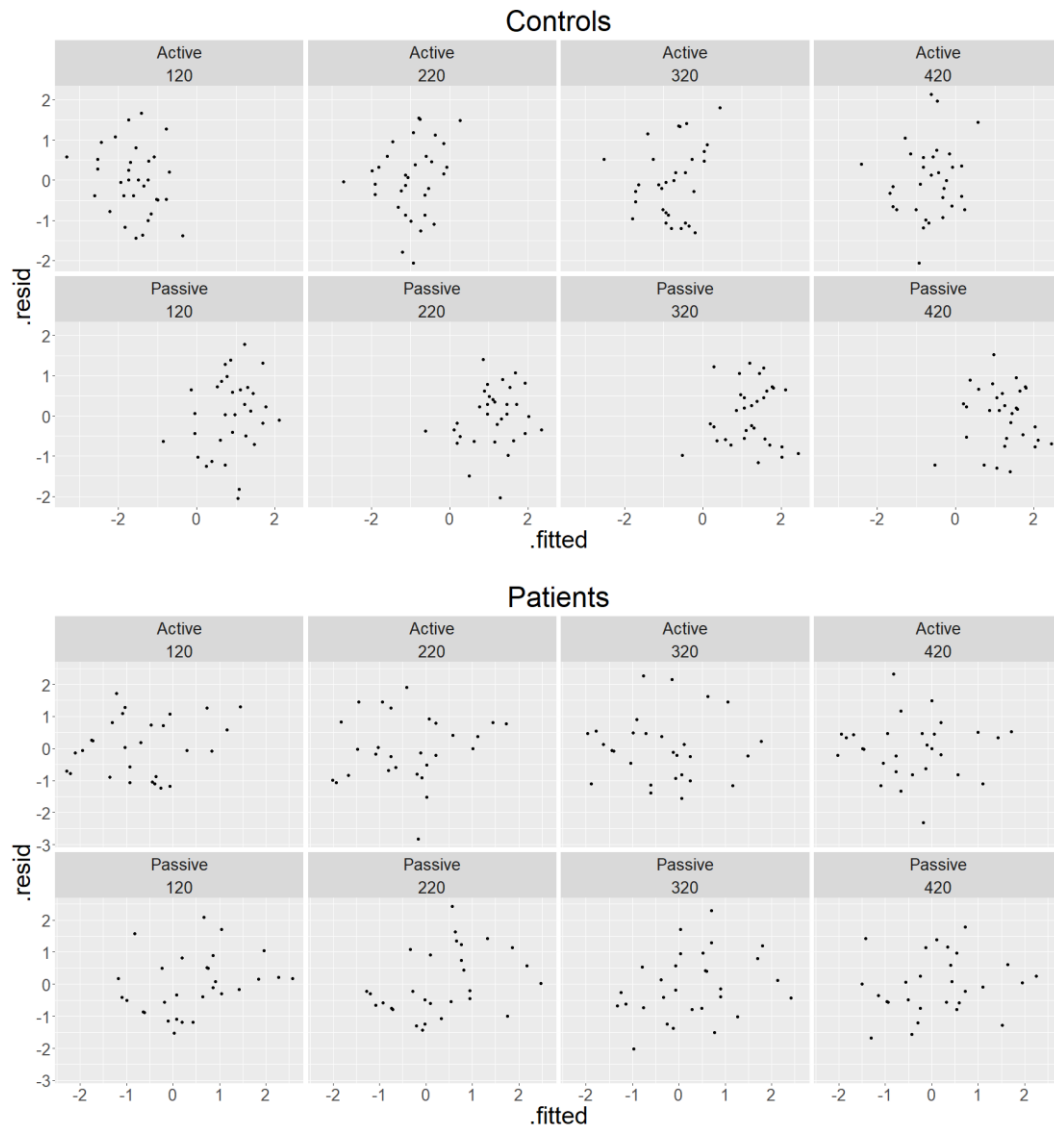

## S2 Exploratory analyses on passivity symptom severity

### S2.1 SoO

#### *Final model*

The final mixed model for patients' SoO data only retains the fixed effect of *Mode of Movement* in addition to the random intercept for each subject.

#### *Model diagnostics*

Normality of random effects. Shapiro-Wilk test of normality ( $W = 0.9581$ ,  $p\text{-value} = 0.2948$ ).

Normality of conditional raw residuals. Shapiro-Wilk test of normality ( $W = 0.9898$ ,  $p\text{-value} = 0.0336$ ).

Homogeneity of variance of conditional raw residuals. Levene's test ( $F_{7,224} = .039$ ,  $p = .843$ ).

### S2.2 SoA

#### *Final model*

The final mixed model for patients' SoA data includes the fixed effect of *Mode of Movement* and *Delay* in addition to the random intercept for each subject.

#### *Model diagnostics*

Normality of random effects. Shapiro-Wilk test of normality ( $W = 0.9839$ ,  $p\text{-value} = 0.9246$ ).

Normality of conditional raw residuals. Shapiro-Wilk test of normality ( $W = 0.9951$ ,  $p\text{-value} = 0.6638$ ).

Homogeneity of variance of conditional raw residuals. Levene's test ( $F_{7,224} = 1.327$ ,  $p = .238$ ).

### S2.3 SoO-Control

#### *Final model*

The final mixed model for patients' SoO data retains the fixed effect of *Mode of Movement*, *Passivity* and *ModexPassivity* in addition to the random intercept for each subject.

#### *Model diagnostics*

Normality of random effects. Shapiro-Wilk test of normality ( $W = 0.9544$ ,  $p\text{-value} = 0.2369$ ).

Normality of conditional raw residuals. Shapiro-Wilk test of normality ( $W = 0.9782$ ,  $p\text{-value} = 0.001$ ).

### S2.4 SoA-Control

#### *Final model*

The final mixed model for patients' SoO data retains the fixed effect of *Mode of Movement*, *Passivity* and *ModexPassivity* in addition to the random intercept for each subject.

#### *Model diagnostics*

Normality of random effects. Shapiro-Wilk test of normality ( $W = 0.9587$ ,  $p\text{-value} = 0.305$ ).

Normality of conditional raw residuals. Shapiro-Wilk test of normality ( $W = 0.9868$ ,  $p\text{-value} = 0.031$ ).

### **S3 Exploratory analyses on antipsychotic dose**

#### **S3.1 SoO**

##### *Final model*

The final mixed model for patients' SoO data retains the fixed effect of *Mode of Movement* and *Olanzapine* in addition to the by-subject random intercept.

##### *Model diagnostics*

Normality of random effects. Shapiro-Wilk test of normality ( $W = 0.9274$ ,  $p\text{-value} = 0.047$ ).

Normality of conditional raw residuals. Shapiro-Wilk test of normality ( $W = 0.9872$ ,  $p\text{-value} = 0.035$ ).

#### **S3.2 SoA**

##### *Final model*

The final mixed model for patients' SoA data retains the fixed effect of *Mode of Movement*, *Olanzapine* and the interaction *Mode of Movement*×*Olanzapine* in addition to the by-subject random intercept.

##### *Model diagnostics*

Normality of random effects. Shapiro-Wilk test of normality ( $W = 0.9786$ ,  $p\text{-value} = 0.802$ ).

Normality of conditional raw residuals. Shapiro-Wilk test of normality ( $W = 0.9965$ ,  $p\text{-value} = 0.882$ ).

#### **S3.3 SoO-Control**

##### *Final model*

The final mixed model for patients' SoO-Control data retains only the by-subject random intercept.

##### *Model diagnostics*

Normality of random effects. Shapiro-Wilk test of normality ( $W = 0.9333$ ,  $p\text{-value} = 0.067$ ).

Normality of conditional raw residuals. Shapiro-Wilk test of normality ( $W = 0.9797$ ,  $p\text{-value} = 0.002$ ).

#### **S3.4 SoA-Control**

##### *Final model*

The final mixed model for patients' SoA-Control data retains the fixed effect of *Mode of Movement* and the by-subject random intercept.

##### *Model diagnostics*

Normality of random effects. Shapiro-Wilk test of normality ( $W = 0.9709$ ,  $p\text{-value} = 0.586$ ).

Normality of conditional raw residuals. Shapiro-Wilk test of normality ( $W = 0.9917$ ,  $p\text{-value} = 0.213$ ).

**S4 F-test full output, correlations for questionnaire and clinical data, and antipsychotics effect**

|                    | <b>df<sub>num</sub></b> | <b>df<sub>den</sub></b> | <b>F</b> | <b>p</b> |     |
|--------------------|-------------------------|-------------------------|----------|----------|-----|
| <b>SoO</b>         |                         |                         |          |          |     |
| <i>Mode</i>        | 1                       | 420                     | 33.309   | <.0001   | *** |
| <i>Delay</i>       | 3                       | 420                     | 21.669   | <.0001   | *** |
| <i>Group</i>       | 1                       | 59                      | 3.383    | 0.071    |     |
| <i>DelayxGroup</i> | 3                       | 420                     | 8.091    | <.0001   | *** |
| <b>SoA</b>         |                         |                         |          |          |     |
| <i>Mode</i>        | 1                       | 416                     | 243.704  | <.0001   | *** |
| <i>Delay</i>       | 3                       | 416                     | 29.124   | <.0001   | *** |
| <i>Group</i>       | 1                       | 59                      | 1.038    | 0.312    |     |
| <i>ModexDelay</i>  | 3                       | 416                     | 3.961    | 0.008    | **  |
| <i>ModexGroup</i>  | 1                       | 416                     | 14.807   | <.0001   | *** |
| <i>DelayxGroup</i> | 3                       | 416                     | 2.598    | 0.052    |     |
| <b>SoO-control</b> |                         |                         |          |          |     |
| <i>Mode</i>        | 1                       | 426                     | 2.898    | 0.089    |     |
| <b>SoA-control</b> |                         |                         |          |          |     |
| <i>Mode</i>        | 1                       | 416                     | 176.225  | <.0001   | *** |
| <i>Delay</i>       | 3                       | 416                     | 8.613    | <.0001   | *** |
| <i>Group</i>       | 1                       | 59                      | 9.572    | 0.003    | **  |
| <i>ModexDelay</i>  | 3                       | 416                     | 2.214    | 0.086    |     |
| <i>ModexGroup</i>  | 1                       | 416                     | 59.706   | <.0001   | *** |
| <i>DelayxGroup</i> | 3                       | 416                     | 2.604    | 0.052    |     |

**Supplementary Table 1.** Results of Type-III ANOVA on questionnaire scores. \*  $p < 0.05$ , \*\*  $p < 0.01$ , \*\*\*  $p < 0.001$

|                       | <b>df<sub>num</sub></b> | <b>df<sub>den</sub></b> | <b>F</b> | <b>p</b> |     |
|-----------------------|-------------------------|-------------------------|----------|----------|-----|
| <b>SoO</b>            |                         |                         |          |          |     |
| <i>Mode</i>           | 1                       | 202                     | 12.819   | 0.0004   | *** |
| <b>SoA</b>            |                         |                         |          |          |     |
| <i>Mode</i>           | 1                       | 199                     | 165.91   | <.0001   | *** |
| <i>Delay</i>          | 3                       | 199                     | 4.684    | 0.004    | **  |
| <b>SoO-control</b>    |                         |                         |          |          |     |
| <i>Mode</i>           | 1                       | 201                     | 0.031    | 0.858    |     |
| <i>Passivity</i>      | 1                       | 27                      | 0.561    | 0.46     |     |
| <i>ModexPassivity</i> | 1                       | 201                     | 2.434    | 0.12     |     |
| <b>SoA-control</b>    |                         |                         |          |          |     |
| <i>Mode</i>           | 1                       | 201                     | 33.497   | <.0001   |     |
| <i>Passivity</i>      | 1                       | 27                      | 0.539    | 0.469    |     |
| <i>ModexPassivity</i> | 1                       | 201                     | 6.867    | 0.009    | **  |

**Supplementary Table 2.** Results of Type-III ANOVA on questionnaire scores of patients considering passivity symptom severity. \*  $p < 0.05$ , \*\*  $p < 0.01$ , \*\*\*  $p < 0.001$

|                        | <b>df<sub>num</sub></b> | <b>df<sub>den</sub></b> | <b>F</b> | <b>p</b> |     |
|------------------------|-------------------------|-------------------------|----------|----------|-----|
| <b>SoO</b>             |                         |                         |          |          |     |
| <i>Mode</i>            | 1                       | 202                     | 12.819   | 0.0004   | *** |
| <i>Olanzapine</i>      | 1                       | 27                      | 4.659    | 0.04     | *   |
| <b>SoA</b>             |                         |                         |          |          |     |
| <i>Mode</i>            | 1                       | 198                     | 166.728  | <.0001   | *** |
| <i>Delay</i>           | 3                       | 198                     | 4.707    | 0.003    | **  |
| <i>Olanzapine</i>      | 1                       | 27                      | 0.49     | 0.49     |     |
| <i>ModexOlanzapine</i> | 1                       | 198                     | 1.981    | 0.161    |     |
| <b>SoA-control</b>     |                         |                         |          |          |     |
| <i>Mode</i>            | 1                       | 202                     | 32.552   | <.0001   | *** |

**Supplementary Table 3.** Results of Type-III ANOVA on questionnaire scores of patients considering olanzapine equivalent dose. \*  $p < 0.05$ , \*\*  $p < 0.01$ , \*\*\*  $p < 0.001$ . Equivalency ratio from Gardner et al. (2010).



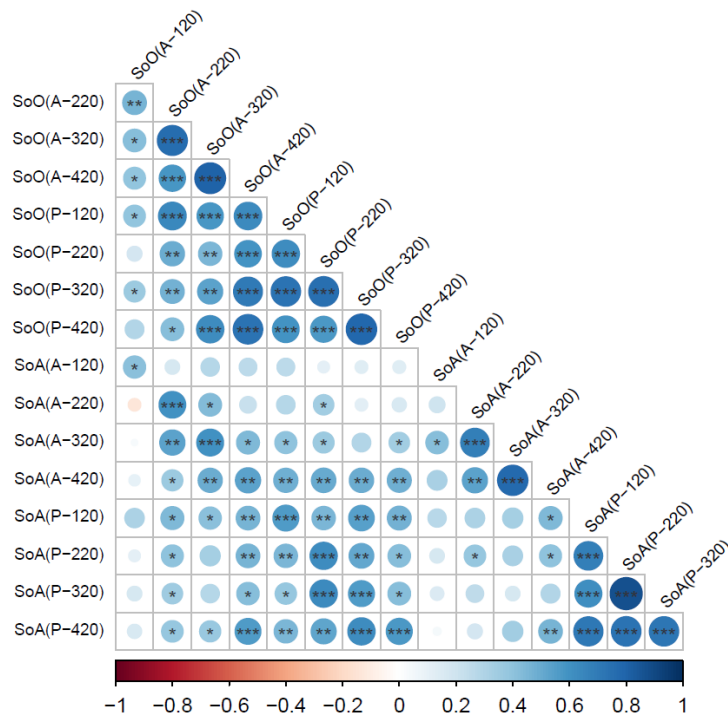

**Supplementary Figure 1. Correlation heatmap matrix for SoO and SoA in the control group.** A = Active condition, P = Passive condition. Positive correlations are displayed in blue, negative correlations in red. Significance is indicated by the asterisks (\*, \*\*, \*\*\* for  $P < .05$ ,  $P < .01$ , and  $P < .001$ , respectively, uncorrected).

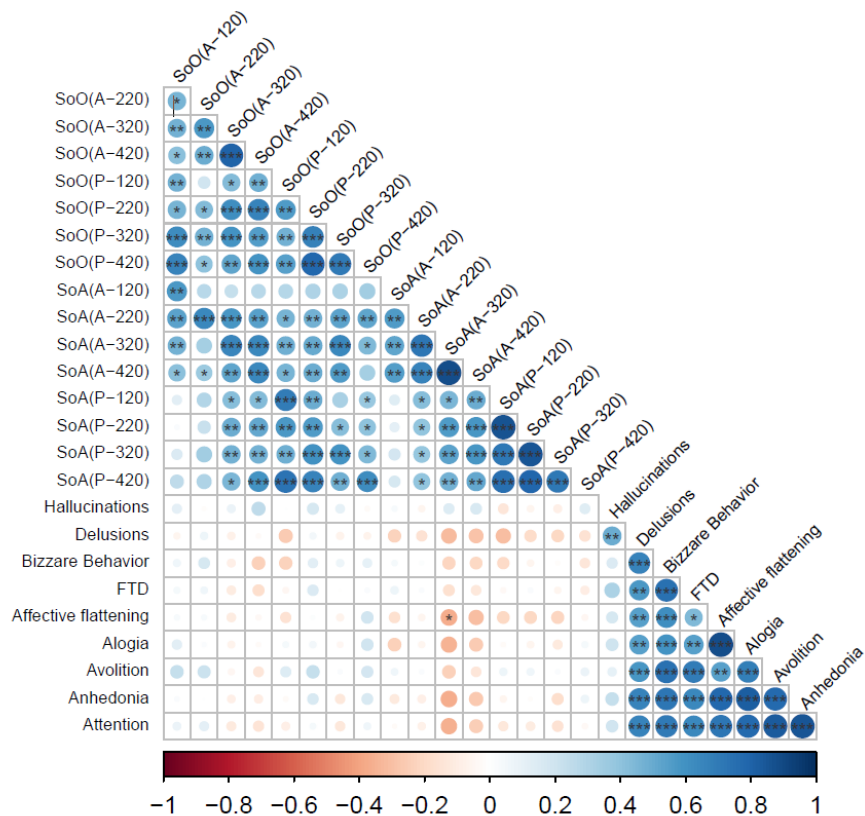

**Supplementary Figure 2. Correlation heatmap matrix for SoO, SoA and psychopathological scales in the clinical group.** A = Active condition, P = Passive condition. Positive correlations are displayed in blue, negative correlations in red. Significance is indicated by the asterisks (\*, \*\*, \*\*\* for  $P < .05$ ,  $P < .01$ , and  $P < .001$ , respectively, uncorrected).

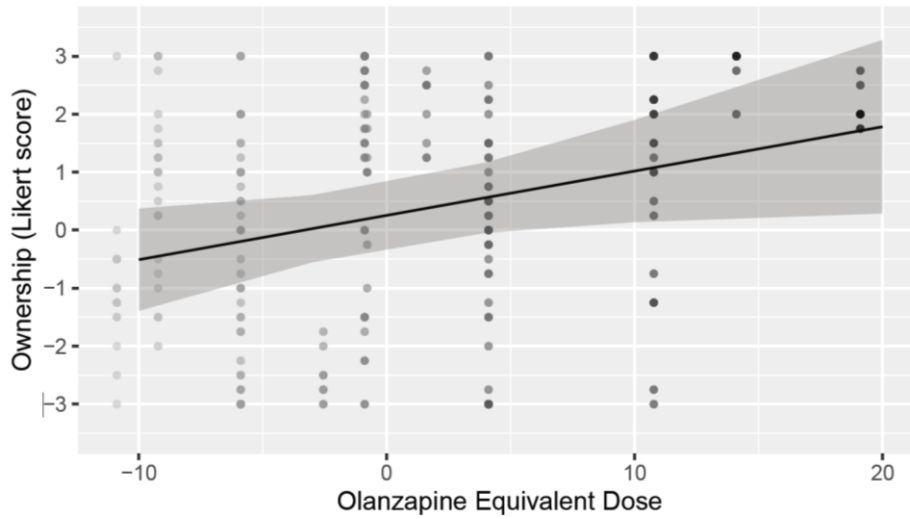

**Supplementary Figure 3. Ownership scores: main effect of olanzapine equivalent dose.** Lines and point in the foreground represent adjusted means and 95% confidence intervals. Shaded points in the background indicate by-subject ownership mean scores.

## **S5 Questionnaire**

### **SoO**

1. Mi sembrava di guardare direttamente la mia mano oltre lo specchio.  
*I felt as if I was looking at my own hand behind the mirror*
2. Mi sembrava che la mano nello specchio fosse una parte del mio corpo.  
*I felt as if the hand in the mirror was part of my body*
3. Mi sembrava che il mio dito reale e il dito nello specchio si muovessero nello stesso posto.  
*It seemed as if I my finger and the mirrored finger moved in the same location.*
4. Mi sembrava che la mano nello specchio mi appartenesse.  
*I felt as if the hand in the mirror was my hand.*

### **SoO-Control**

5. Sembrava che la mia mano reale diventasse di gomma.  
*I felt as if my real hand were turning rubbery.*
6. Mi sembrava di avere più di una mano destra/sinistra.  
*It seems as if I had more than one right/left hand.*
7. Sembrava che la mano nello specchio si muovesse verso la mia mano.  
*It appeared as if the hand in the mirror were drifting towards my real hand.*
8. Sembrava che la mia mano destra/sinistra fosse sparita.  
*It felt as if my right/left hand had disappeared.*

### **SoA**

9. La mano nello specchio si muoveva proprio come volevo, come se stesse obbedendo alla mia volontà.  
*The hand in the mirror moved just like I wanted it to, as if it was obeying my will.*
10. Sembrava che fossi io a controllare i movimenti della mano nello specchio.  
*It seemed as if I was controlling the movements of the hand in the mirror.*
11. Sembrava che fossi io a causare i movimenti della mano nello specchio.  
*It seemed as if I was causing the movement of the hand in the mirror.*
12. Ogni volta che muovevo il mio dito, mi aspettavo di vedere il dito nello specchio muoversi allo stesso modo.  
*Whenever I moved my finger I expected the finger in the mirror to move in the same way*

### **SoA-control**

13. Mi sembrava che la mano nello specchio stesse controllando la mia volontà.  
*It seemed as if the hand in the mirror was controlling my will.*
14. Sembrava che la mano nello specchio stesse controllando i miei movimenti.  
*It seemed as if the hand in the mirror was controlling my movements.*
15. Mi sembrava di sentire i miei movimenti nello spazio tra la mia mano reale e la mano nello specchio.  
*I could sense the movement from somewhere between my real hand and the hand in the mirror.*
16. Sembrava che la mano nello specchio avesse una sua propria volontà.  
*It seemed as if the hand in the mirror had a will of its own.*
